# Ultrasound-guided Lumbar Plexus Block in Supine Position

Yong Liu, M.D., Ph.D., Xijian Ke, M.D., Ph.D., Xi Wu, M.D., Ph.D., Wei Mei, M.D., Ph.D.

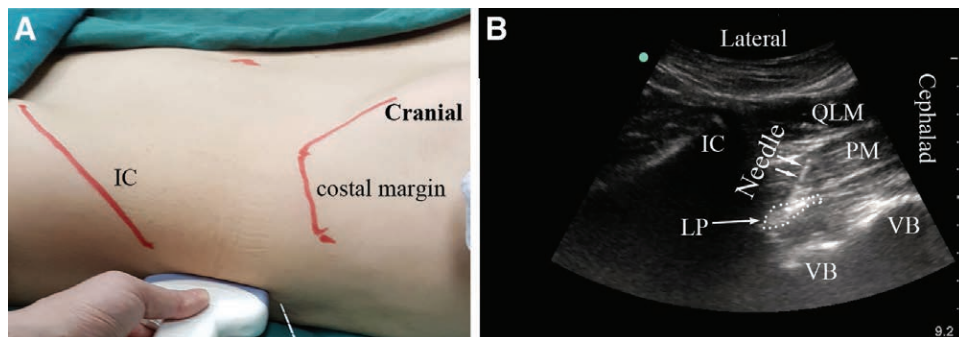

**T**HE LUMBAR plexus lies in a fascial plane within the posterior one third of the psoas major muscle.<sup>1</sup> The quadratus lumborum muscle lies laterally to the psoas major muscle. It is possible to block the lumbar plexus with a lateral-to-medial trans-quadratus lumborum muscle approach in the supine position.

A 2 to 5 MHz curved array probe is placed at the posterior axillary line to perform a sagittal scan (panel A). Panel B shows the long axis of the quadratus lumborum muscle (QLM) and psoas major muscle (PM), the iliac crest (IC), the lumbar vertebral body (VB), and the long axis of the lumbar plexus (LP). The lumbar plexus is identified as longitudinal hyperechoic structures located lateral to the vertebral body and in the psoas major muscle. The lumbar plexus block can be successfully performed with the needle inserted in a cephalad-to-caudad direction passing through the quadratus lumborum muscle. This can be seen in the Supplemental Digital Content Video (<http://links.lww.com/ALN/B551>).

Compared with the classic approach,<sup>2,3</sup> this approach may offer several advantages. It allows the patient to remain supine and is especially useful for patients who are unsuitable for the lateral position. In addition, it may minimize the risk of intrathecal injection and allow subsequent quadratus lumborum blocks during withdrawal of the needle. Kidney and bowel injuries are potential complications for this approach. The longitudinal scanning technique facilitates identification of the lumbar plexus in long axis, which may be appropriate for placing a catheter along the lumbar plexus.

## Research Support

Supported by the Clinical Research Physician Program of Tongji Medical College, Huazhong University of Science and Technology, Wuhan, China.

## Competing Interests

The authors declare no competing interests.

## Correspondence

Address correspondence to Dr. Mei: [wmei@hust.edu.cn](mailto:wmei@hust.edu.cn)

## References

1. Awad IT, Duggan EM: Posterior lumbar plexus block: Anatomy, approaches, and techniques. *Reg Anesth Pain Med* 2005; 30:143–9
2. Karmakar MK, Li JW, Kwok WH, Hadzic A: Ultrasound-guided lumbar plexus block using a transverse scan through the lumbar intertransverse space: A prospective case series. *Reg Anesth Pain Med* 2015; 40:75–81
3. Strid JMC, Sauter AR, Ullensvang K, Andersen MN, Daugaard M, Bendtsen MAF, Søballe K, Pedersen EM, Børghlum J, Bendtsen TF: Ultrasound-guided lumbar plexus block in volunteers: A randomized controlled trial. *Br J Anaesth* 2017; 118:430–8

Charles D. Collard, M.D., served as Handling Editor for this article. Supplemental Digital Content is available for this article. Direct URL citations appear in the printed text and are available in both the HTML and PDF versions of this article. Links to the digital files are provided in the HTML text of this article on the Journal's Web site ([www.anesthesiology.org](http://www.anesthesiology.org)).

From the Department of Anesthesiology, Tongji Hospital, Tongji Medical College, Huazhong University of Science and Technology, Wuhan, China. Copyright © 2018, the American Society of Anesthesiologists, Inc. Wolters Kluwer Health, Inc. All Rights Reserved. *Anesthesiology* 2018; 128:812
